# Supplementary material for: Mechano-boosting nanomedicine antitumour efficacy by blocking the reticuloendothelial system with stiff nanogels
Source: Springer Nature journal article supplement (doi:10.1038/s41467-023-37150-3), 2023-03-15
Supplement: MOESM1 [file 41467_2023_37150_MOESM1_ESM.pdf]

## **Supplementary Information for**

### **Mechano-boosting nanomedicine antitumour efficacy by blocking the reticuloendothelial system with stiff nanogels**

Zheng Li<sup>1</sup>, Yabo Zhu<sup>1</sup>, Haowen Zeng<sup>1</sup>, Chong Wang<sup>1</sup>, Chen Xu<sup>1</sup>, Qiang Wang<sup>1</sup>, Huimin Wang<sup>1</sup>, Shiyu Li<sup>1</sup>, Jitang Chen<sup>1</sup>, Chen Xiao<sup>1</sup>, Xiangliang Yang<sup>1, 2, 3, 4</sup> and Zifu Li<sup>1, 2, 3, 5, \*</sup>

<sup>1</sup> National Engineering Research Center for Nanomedicine, College of Life Science and Technology, Huazhong University of Science and Technology, Wuhan, 430074, P. R. China

<sup>2</sup> Key Laboratory of Molecular Biophysics of Ministry of Education, College of Life Science and Technology, Huazhong University of Science and Technology, Wuhan, 430074, P. R. China

<sup>3</sup> Hubei Key Laboratory of Bioinorganic Chemistry and Materia Medical, Huazhong University of Science and Technology, Wuhan, 430074, P. R. China

<sup>4</sup> GBA Research Innovation Institute for Nanotechnology, Guangdong, 510530, P. R. China

<sup>5</sup> Hubei Engineering Research Center for Biomaterials and Medical Protective Materials, Huazhong University of Science and Technology, Wuhan, 430074, P. R. China

\* Address correspondence to:

Zifu Li, Ph.D., Professor

Huazhong University of Science and Technology

1037 Luoyu Road, Wuhan, 430074, P. R. China

E-mail: zifuli@hust.edu.cn

## Supplementary Tables

**Supplementary Table 1.** Relative fluorescent intensity of Rhodamine-labeled nanogels with distinctive stiffness at same mass.

|                                | 2%NGs | 5%NGs | 10%NGs | 15%NGs |
|--------------------------------|-------|-------|--------|--------|
| Relative fluorescent intensity | 1     | 0.97  | 1.93   | 2.05   |

**Supplementary Table 2.** Pharmacokinetic parameters of ICG-loaded 2%NGs with or without RES-blockade.  $t_{1/2}$ , half-life time; AUC, area under the curve; Vd, apparent volume of distribution; CL, plasma clearance.

|              | $t_{1/2}$ (h) | AUC (mg·L <sup>-1</sup> ·h <sup>-1</sup> ) | Vd (L·kg <sup>-1</sup> ) | CL (L·kg <sup>-1</sup> ·h <sup>-1</sup> ) |
|--------------|---------------|--------------------------------------------|--------------------------|-------------------------------------------|
| Control      | 0.70 ± 0.14   | 8.90 ± 2.15                                | 0.63 ± 0.03              | 0.65 ± 0.14                               |
| 2%-blockade  | 0.87 ± 0.41   | 9.84 ± 4.58                                | 0.70 ± 0.03              | 0.63 ± 0.25                               |
| 15%-blockade | 2.29 ± 0.36   | 41.49 ± 8.71                               | 0.45 ± 0.04              | 0.14 ± 0.03                               |

**Supplementary Table 3.** Mass and molar ratio to NIPMAM of components in nanogels with different stiffness.

| Nanogels | NIPMAM | BAC            | MAA           | SDS   | KPS   |
|----------|--------|----------------|---------------|-------|-------|
| 2%NGs    |        | 22.5 mg (2%)   |               | 35 mg |       |
| 5%NGs    | 550 mg | 56.3 mg (5%)   | 18.65 μL (5%) | 30 mg | 10 mg |
| 10%NGs   |        | 112.6 mg (10%) |               | 25 mg |       |
| 15%NGs   |        | 168.9 mg (15%) |               | 20 mg |       |

**Supplementary Table 4.** Primers for qPCR.

| Gene  | Forward primer        | Reverse primer            |
|-------|-----------------------|---------------------------|
| Clta  | GAGAGTGAGATTGCGGGCAT  | GTCAACAGCATCCGGACCTC      |
| Cltc  | GCCAGATGTCGTCCTGGAAA  | GCATCTAATTTATCCACCTTGGTCA |
| Ap2a1 | TAATGCCCTCAAGACGGAGC  | CGGATGGCATAGTCAGCAGT      |
| Ap2a2 | CCAGTGCTGCGTCCACA     | TCTGAGAACACGTCCACCAG      |
| Ap2b1 | GATGCCCCGAGCAGCTATGAT | TTCATATGGCGGTGAGCAG       |

---

|       |                        |                        |
|-------|------------------------|------------------------|
| Ap2m1 | TTCAAGCCCTCACTTCTGGC   | TGCCATGCGCTTGATCTTCC   |
| Ap2s1 | CACCAACTTTGTGGAGTTCCG  | GTTGTGGATGGCCTCGAGAT   |
| GAPDH | TGACAACTTTGGCATTGTGGAA | GTGGATGCAGGGATGATGTTCT |

---

## Supplementary Figures

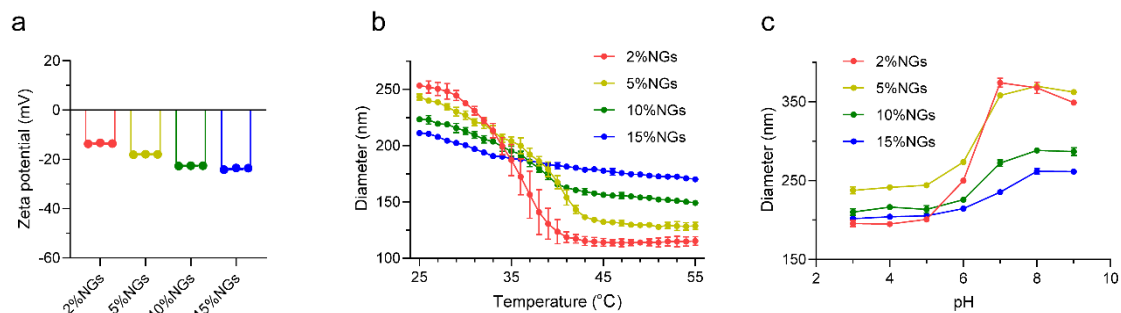

**Supplementary Figure 1. Characterization of nanogels with distinctive stiffness.** **a** Zeta-potential of nanogels with different stiffness in H<sub>2</sub>O. Data are presented as mean values  $\pm$  SD ( $n = 3$  independent replicates). **b** Temperature-responsiveness and **c** pH-responsiveness of nanogels with different stiffness in H<sub>2</sub>O. Data are presented as mean values  $\pm$  SD ( $n = 3$  independent replicates). Source data are provided as a Source Data file.

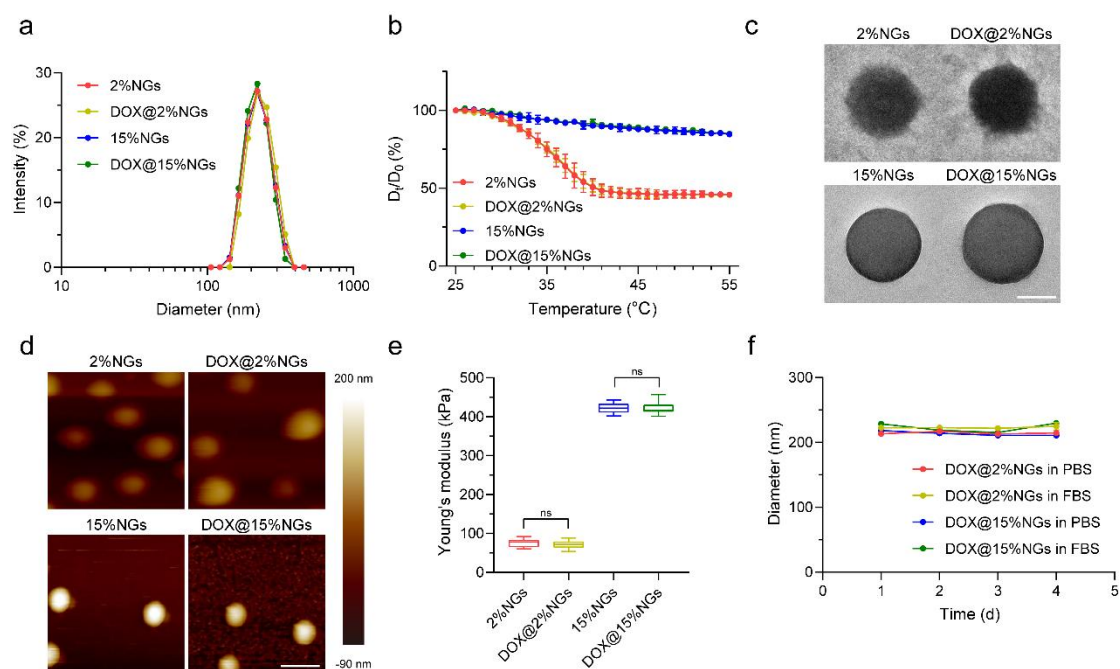

**Supplementary Figure 2. Characterization of nanogels with or without loading DOX.** **a** Size distribution of nanogels with different stiffness with or without loading DOX. **b** Temperature-responsiveness of nanogels with different stiffness with or without loading DOX in H<sub>2</sub>O. Data are presented as mean values  $\pm$  SD ( $n = 3$  independent replicates). **c** TEM images of nanogels with different stiffness with or without loading DOX. Scale bar = 100 nm. **d** AFM images of nanogels with different stiffness with or without loading DOX.

Scale bar = 200 nm. **e** Young's modulus of nanogels with different stiffness with or without loading DOX. Box plots indicate median (middle line), 25th, 75th percentile (box) and minimum and maximum (whiskers) ( $n = 15$  independent replicates). **f** Stability of DOX@2%NGs and DOX@15%NGs in PBS or FBS. Data are presented as mean values  $\pm$  SD ( $n = 3$  independent replicates). Statistical significance was calculated by unpaired two-sided Student's t-test. Source data are provided as a Source Data file.

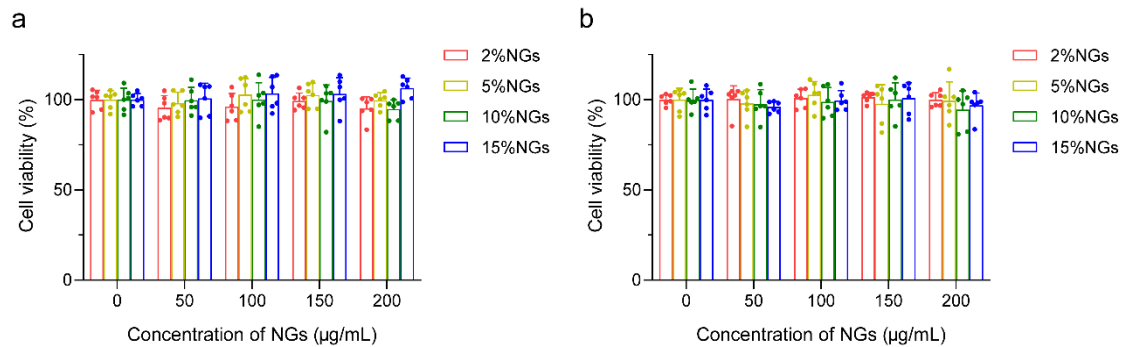

**Supplementary Figure 3. Cytotoxicity of nanogels with different stiffness.** Cytotoxicity of nanogels with different stiffness for **a** 48 h and **b** 72 h. Data are presented as mean values  $\pm$  SD ( $n = 6$  biological independent replicates). Source data are provided as a Source Data file.

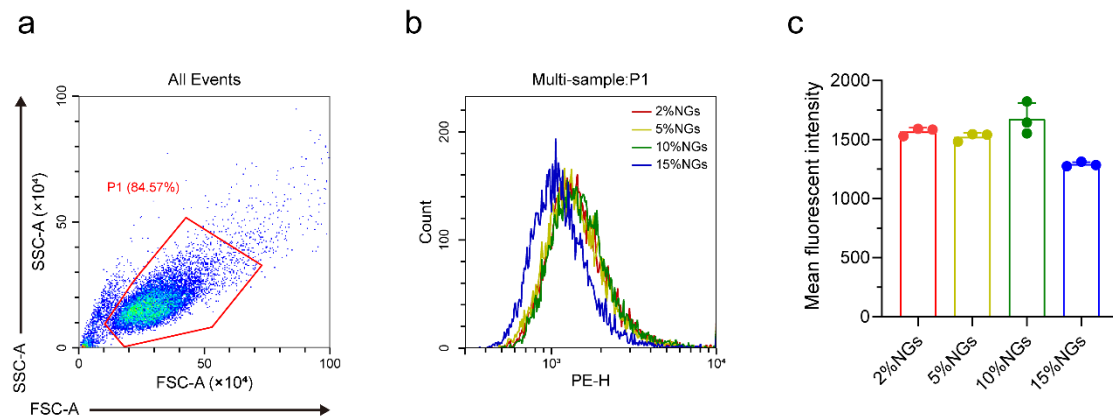

**Supplementary Figure 4. Cellular uptake efficiency of nanogels with different stiffness by 4T1 cells.** **a** Gating strategy for cellular uptake. **b** Flow cytometry graphs of 4T1 cells after internalization of Rhodamine-labeled nanogels with different stiffness. **c** Mean fluorescent intensity of 4T1 cells after internalization of Rhodamine-labeled nanogels with different stiffness. Data are presented as mean values  $\pm$  SD ( $n = 3$  biological

independent replicates). Source data are provided as a Source Data file.

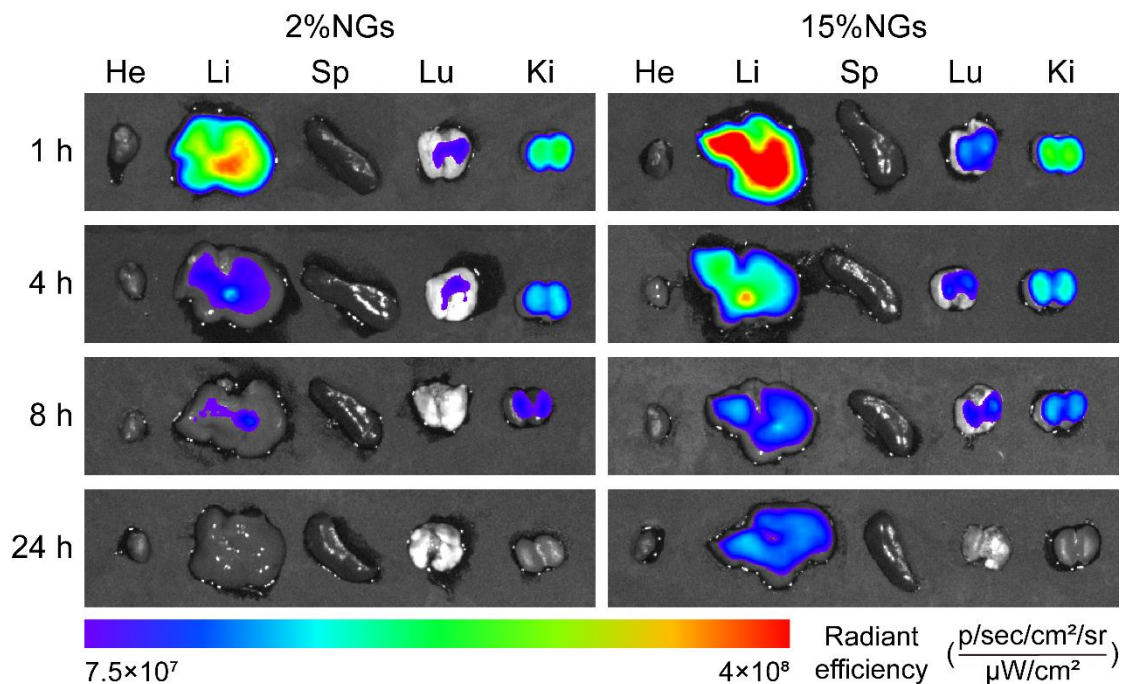

**Supplementary Figure 5. Ex vivo fluorescent images of ICG-loaded nanogels with different stiffness in major organs.** He, heart; Li, liver; Sp, spleen; Lu, lung; Ki, kidney.

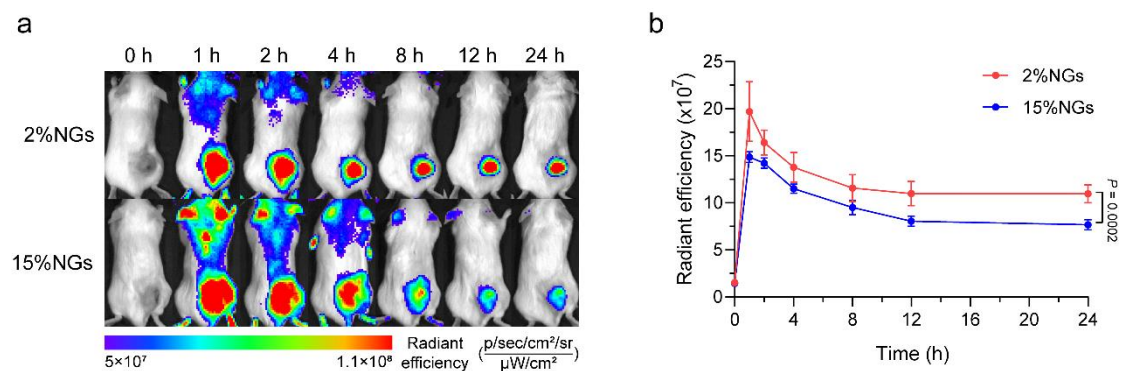

**Supplementary Figure 6. Tumour accumulation of ICG-loaded nanogels with different stiffness.** **a** In vivo fluorescent images of tumour accumulation of ICG-loaded nanogels with different stiffness. **b** Semi-quantification of the quantity of ICG-loaded nanogels with different stiffness in tumour. Data are presented as mean values  $\pm$  SD ( $n = 5$  biological independent replicates). Statistical significance was calculated by unpaired two-sided Student's t-test. Source data are provided as a Source Data file.

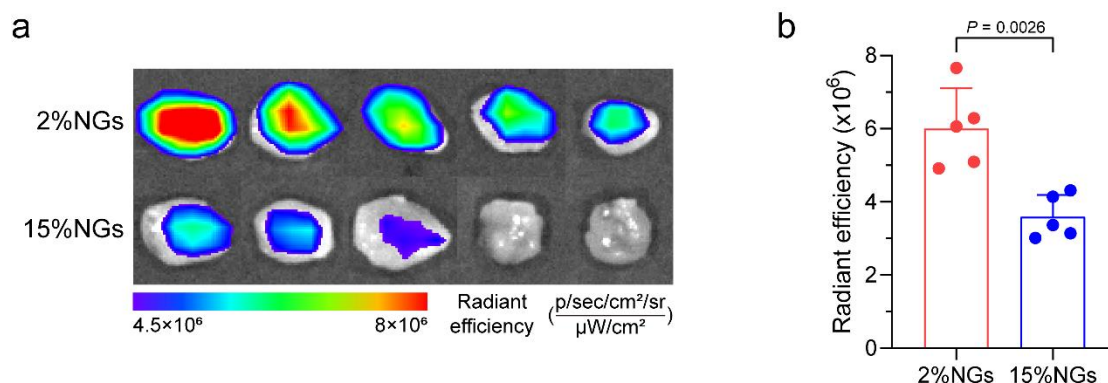

**Supplementary Figure 7. Tumour accumulation of Rhodamine-labeled nanogels with different stiffness.** **a** Ex vivo fluorescent images of tumour accumulation of Rhodamine-labeled nanogels with different stiffness. **b** Semi-quantification of the quantity of Rhodamine-labeled nanogels with different stiffness in tumour. Data are presented as mean values  $\pm$  SD ( $n = 5$  biological independent replicates). Statistical significance was calculated by unpaired two-sided Student's t-test. Source data are provided as a Source Data file.

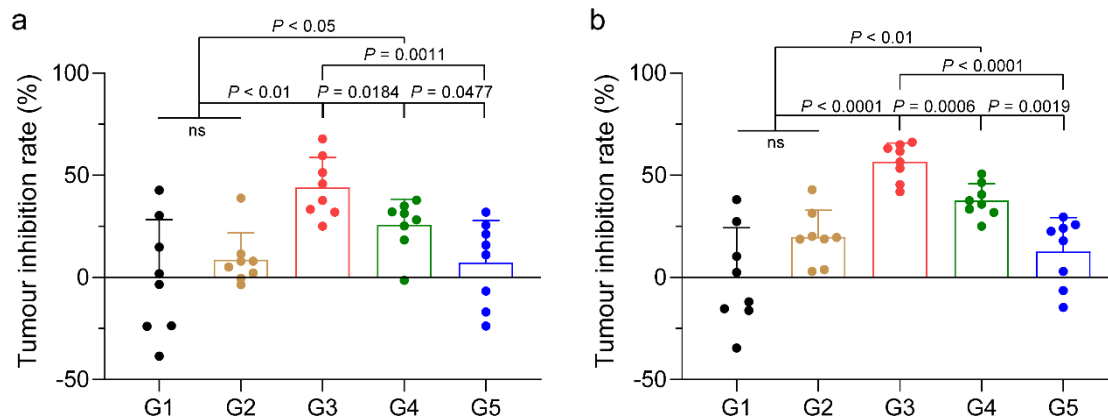

**Supplementary Figure 8. Tumour inhibition rate of DOX-loaded nanogels with different stiffness.** **a** Volume-based and **b** weight-based tumour inhibition rate. Data are presented as mean values  $\pm$  SD ( $n = 8$  biological independent replicates). Statistical significance was calculated by unpaired two-sided Student's t-test. G1, Control; G2, free DOX; G3, DOX@2%NGs; G4, DOX@10%NGs; G5, DOX@15%NGs. Source data are provided as a Source Data file.



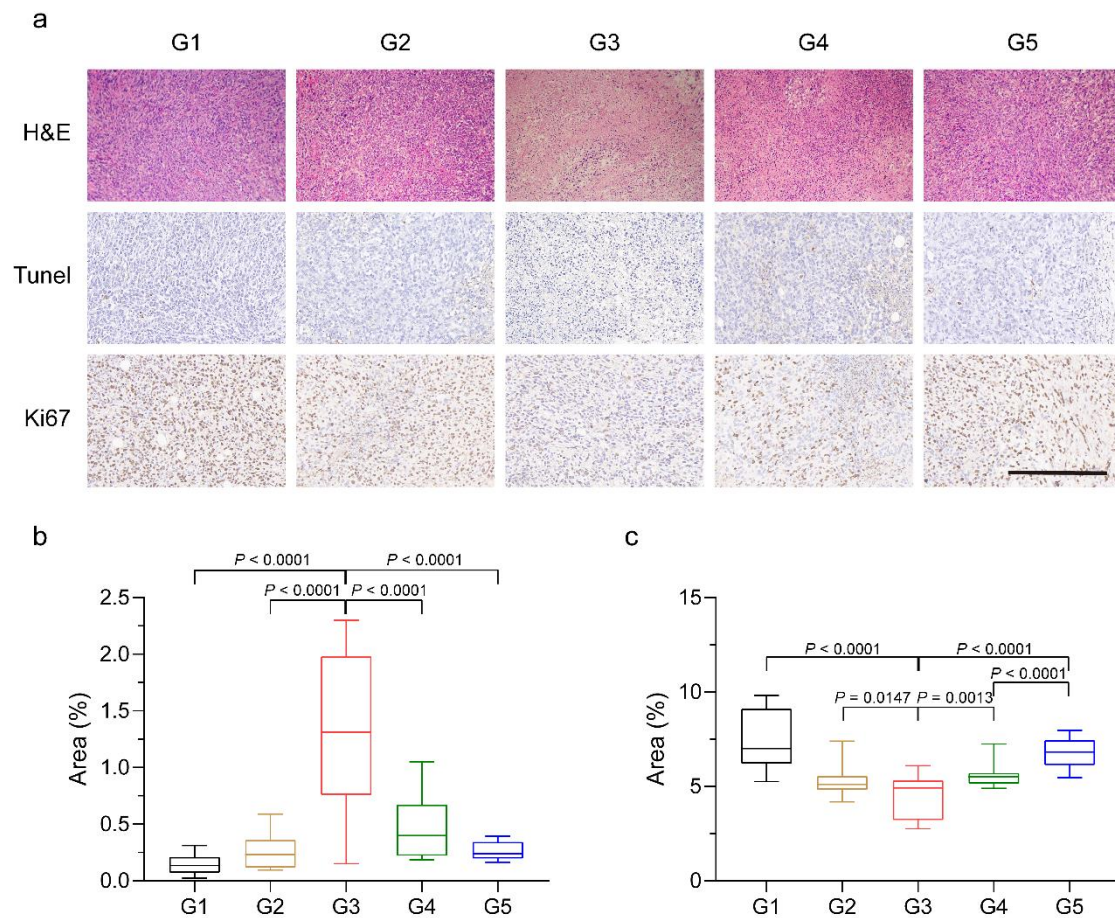

**Supplementary Figure 9. Apoptosis and proliferation of tumour cells after treatment by DOX-loaded nanogels with different stiffness.** **a** H&E, Tunel and Ki67 staining of tumours. Scale bar = 500  $\mu$ m. Percentage of the area of **b** apoptotic cells and **c** proliferative cells. Box plots indicate median (middle line), 25th, 75th percentile (box) and minimum and maximum (whiskers) ( $n = 15$  independent replicates). Statistical significance was calculated by unpaired two-sided Student's t-test. G1, Control; G2, free DOX; G3, DOX@2%NGs; G4, DOX@10%NGs; G5, DOX@15%NGs. Source data are provided as a Source Data file.



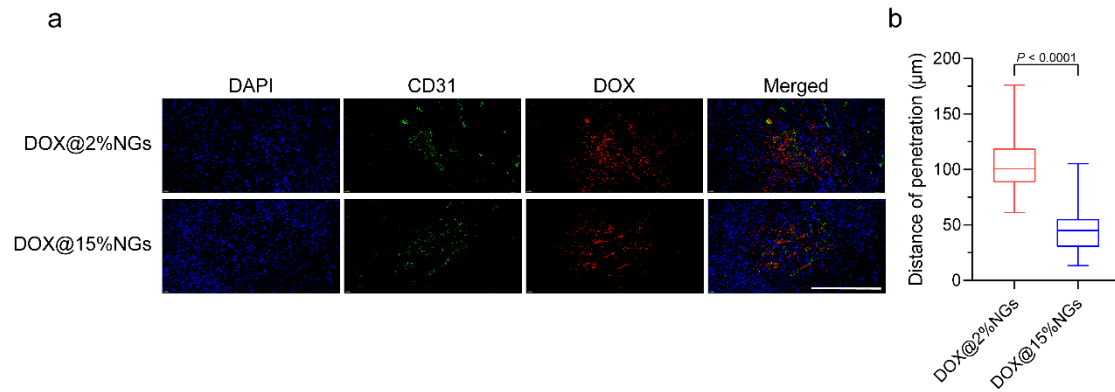

**Supplementary Figure 10. Tumour penetration of nanogels with different stiffness. a** CD31 staining of tumours. Blue: nuclei of tumour cells. Green: blood vessels. Red: DOX-loaded nanogels. Scale bar = 500 µm. **b** Distance from DOX-loaded nanogels with different stiffness to the nearest blood vessel. Box plots indicate median (middle line), 25th, 75th percentile (box) and minimum and maximum (whiskers) ( $n = 80$  independent replicates). Statistical significance was calculated by unpaired two-sided Student's t-test. Source data are provided as a Source Data file.

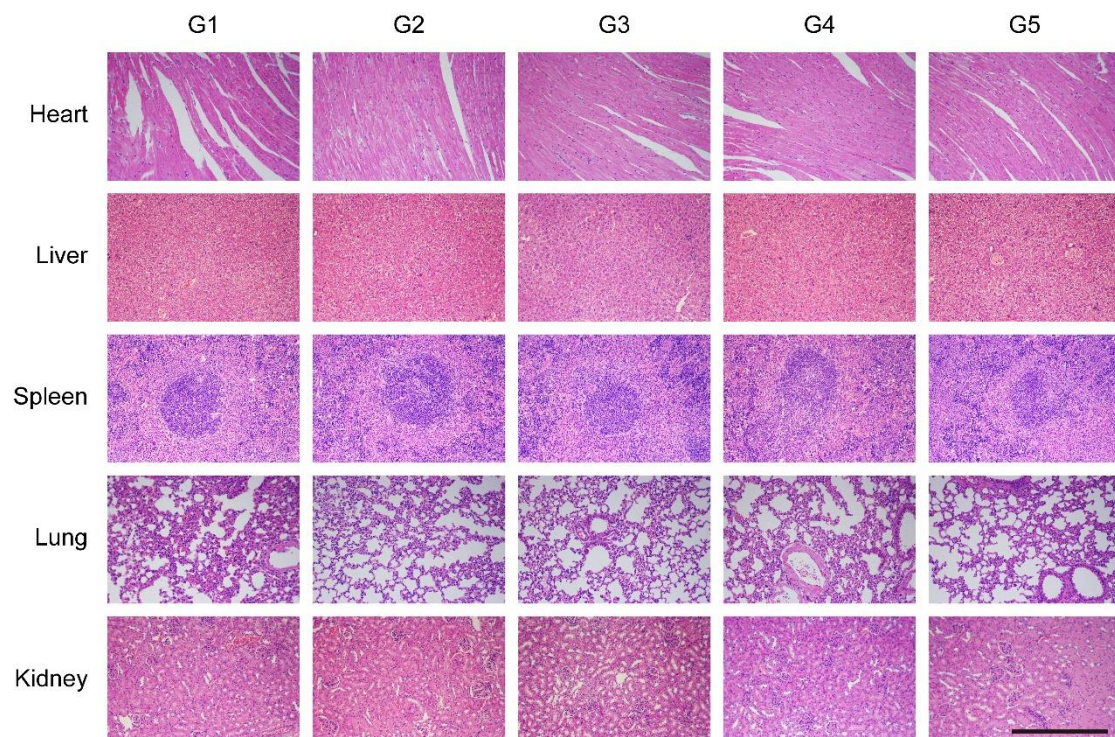

**Supplementary Figure 11. Safety of treatment by DOX-loaded nanogels with different stiffness.** H&E staining of major organs, including heart, liver, spleen, lung and kidney. Scale bar = 500 µm. G1, Control; G2, free DOX; G3, DOX@2%NGs; G4, DOX@10%NGs; G5, DOX@15%NGs.

G5, DOX@15%NGs.

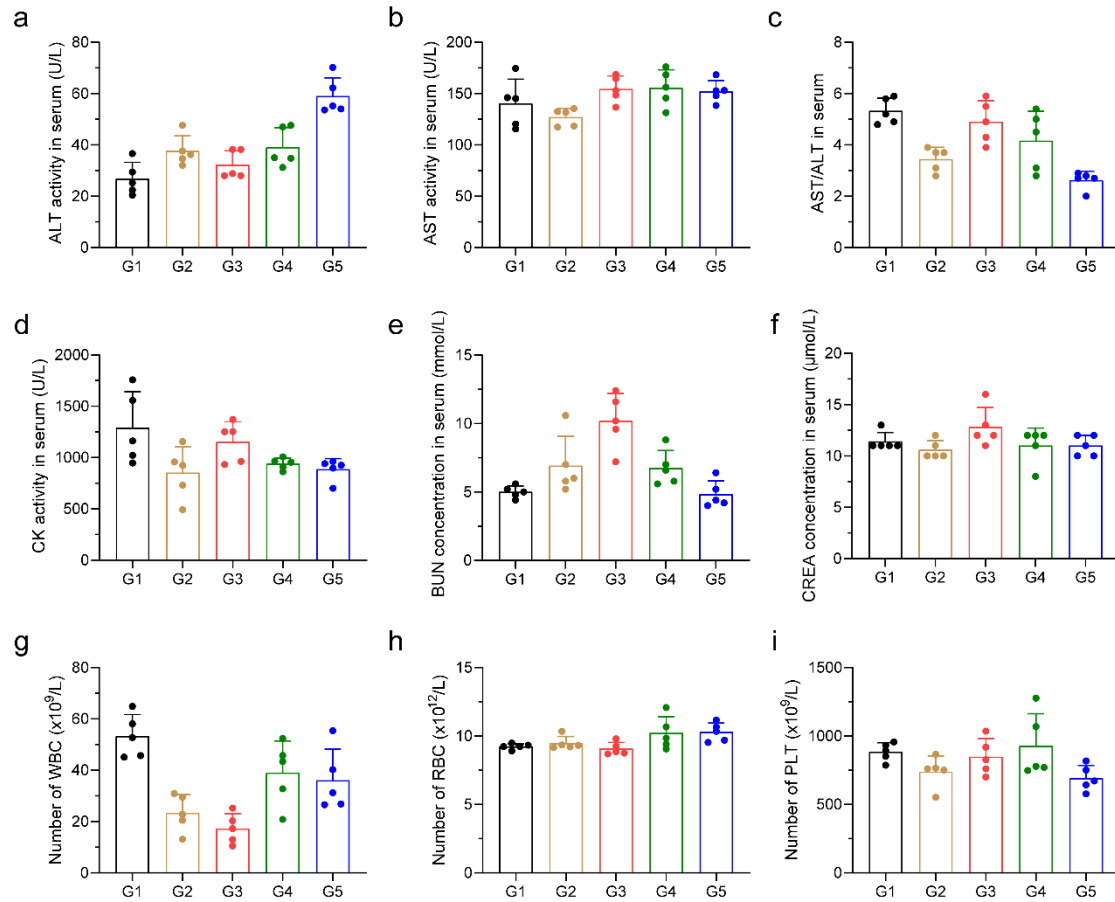

**Supplementary Figure 12. Safety of treatment by DOX-loaded nanogels with different**

**stiffness. a-f** Blood biochemical analysis and **g-i** blood routine examine after treatment.

Data are presented as mean values  $\pm$  SD ( $n = 5$  biological independent replicates). G1, Control; G2, free DOX; G3, DOX@2%NGs; G4, DOX@10%NGs; G5, DOX@15%NGs.

Source data are provided as a Source Data file.

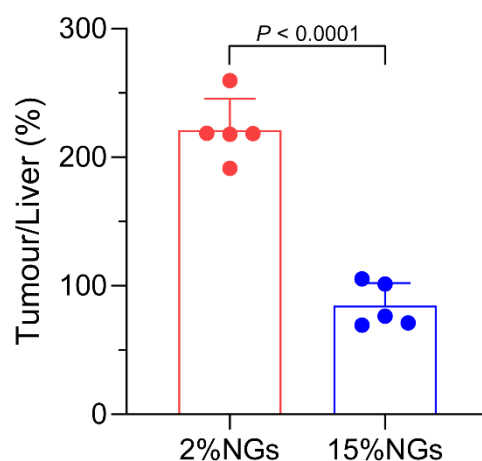

**Supplementary Figure 13. Relative accumulation of tumour to liver of ICG-loaded nanogels with different stiffness.** Data are presented as mean values  $\pm$  SD ( $n = 5$  biological independent replicates). Statistical significance was calculated by unpaired two-sided Student's t-test. Source data are provided as a Source Data file.

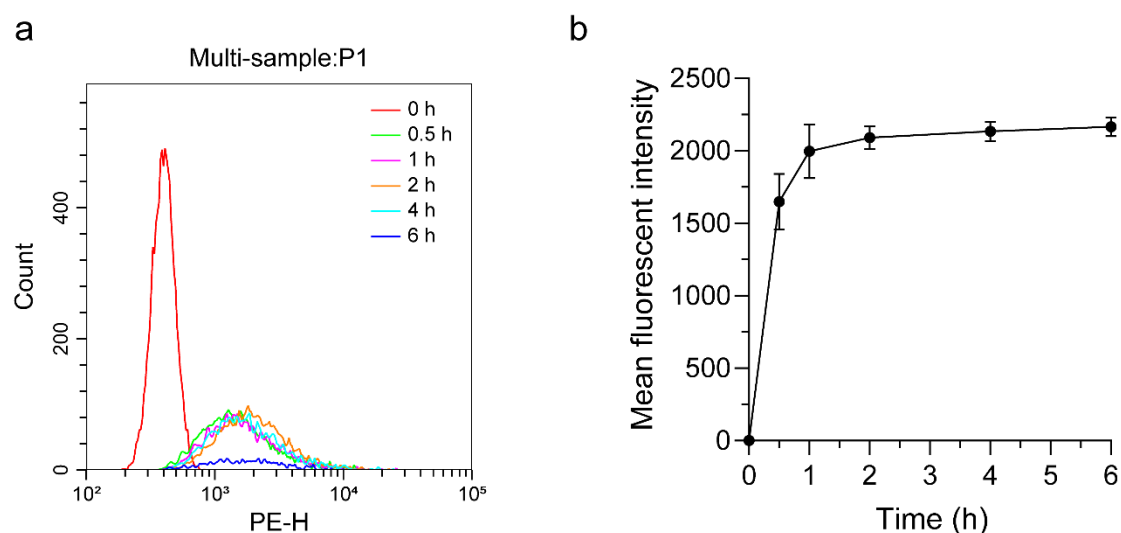

**Supplementary Figure 14. Cellular uptake of Rhodamine-labeled nanogels with different stiffness by RAW 264.7 cells.** **a** Flow cytometry graphs of RAW 264.7 cells after internalization of Rhodamine-labeled 15%NGs. **b** Cellular uptake of Rhodamine-labeled 15%NGs by RAW 264.7 cells. Data are presented as mean values  $\pm$  SD ( $n = 3$  biological independent replicates). Source data are provided as a Source Data file.

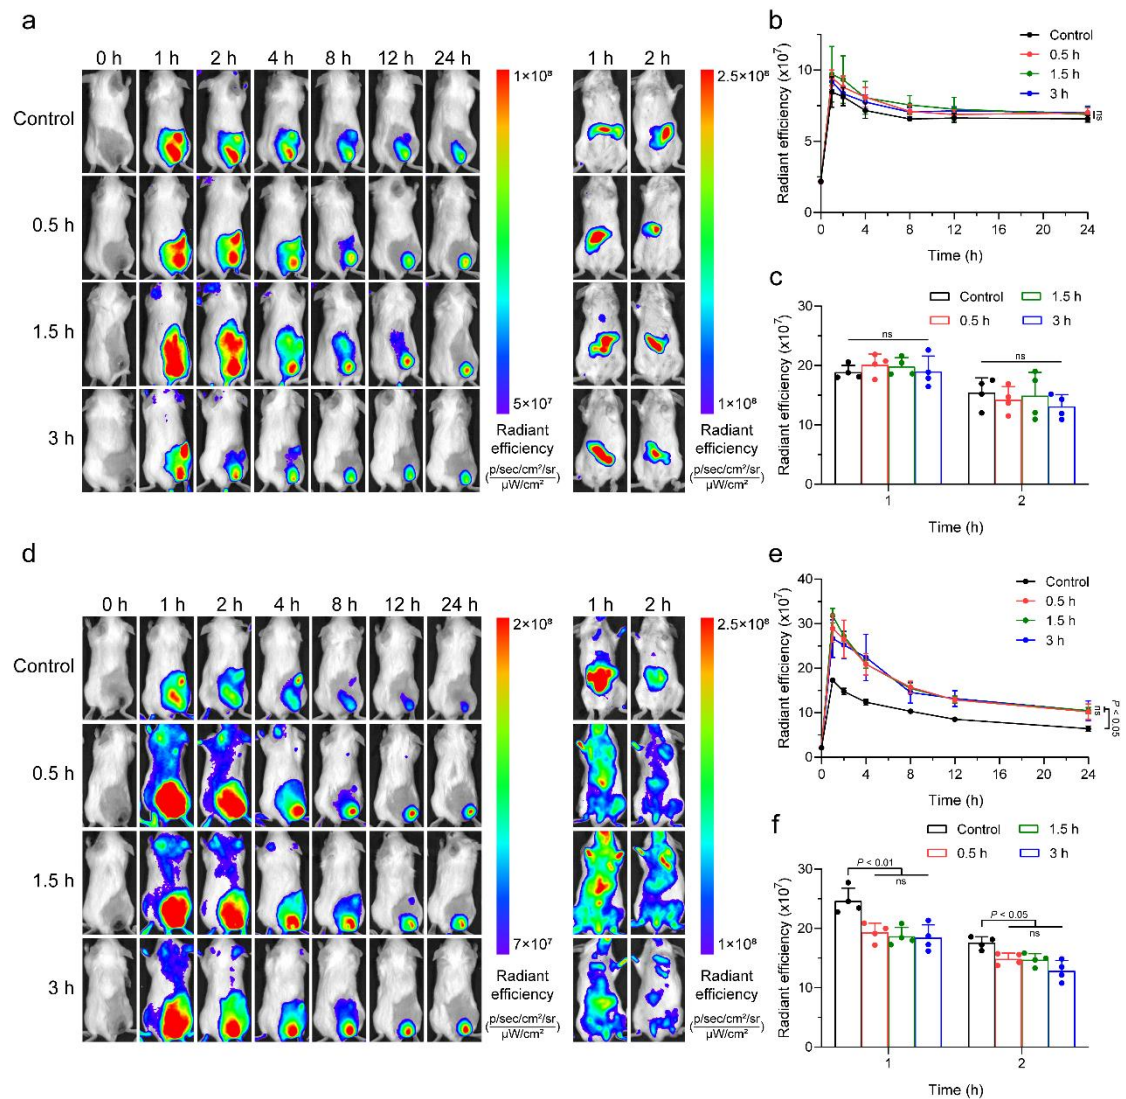

**Supplementary Figure 15. Biodistribution of ICG-loaded 2%NGs after RES-blockade with different time interval.** **a** Tumour accumulation and liver accumulation of ICG-loaded 2%NGs after RES-blockade by 2%NGs with different time interval. Semi-quantification of the quantity of ICG-loaded 2%NGs in **b** tumour and **c** liver. Data are presented as mean values  $\pm$  SD ( $n = 4$  biological independent replicates). **d** Tumour accumulation and liver accumulation of ICG-loaded 2%NGs after RES-blockade by 15%NGs with different time interval. Semi-quantification of the quantity of ICG-loaded 2%NGs in **e** tumour and **f** liver. Data are presented as mean values  $\pm$  SD ( $n = 4$  biological independent replicates). Statistical significance was calculated by one-way ANOVA. Source data are provided as a Source Data file.



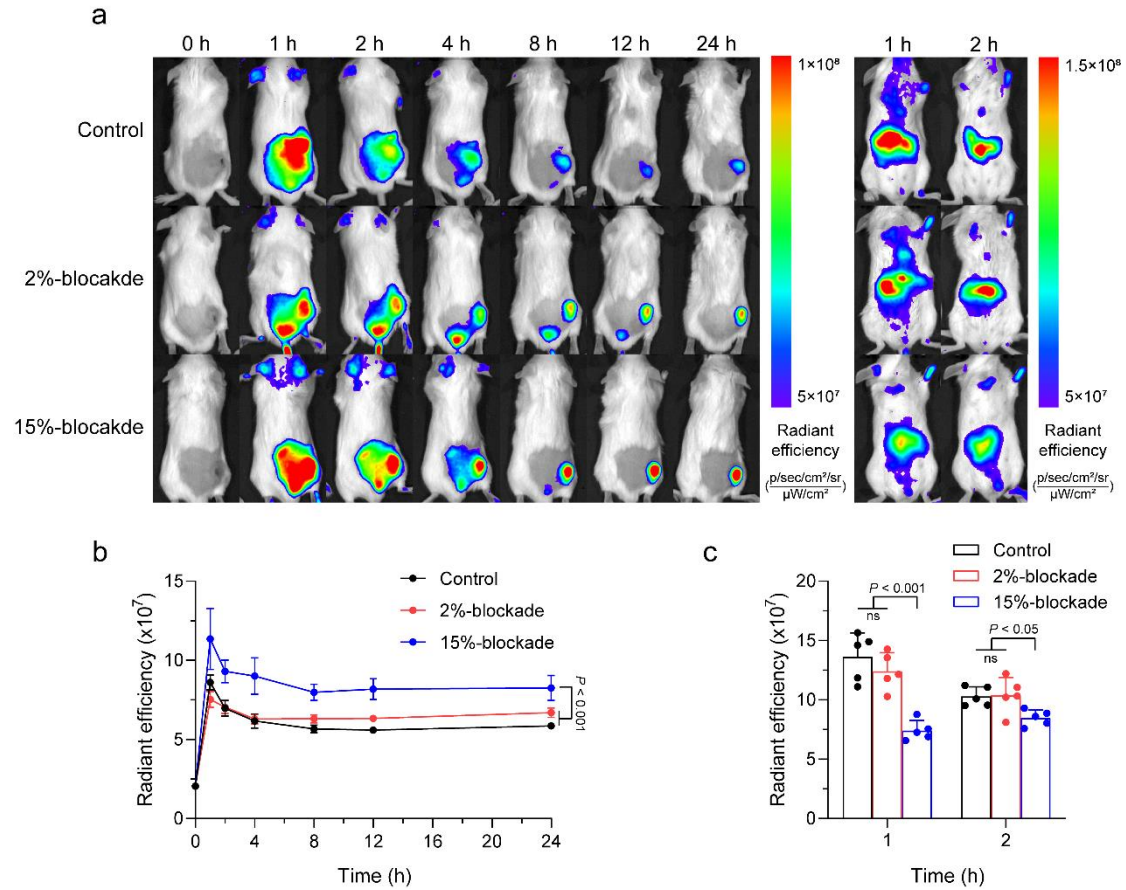

**Supplementary Figure 16. Biodistribution of ICG-loaded 2%NGs after RES-blockade by nanogels with different stiffness.** **a** In vivo fluorescent images of tumour accumulation and liver accumulation of ICG-loaded 2%NGs after RES-blockade by nanogels with different stiffness at dosage of 200 mg/kg. Semi-quantification of the quantity of ICG-loaded 2%NGs in **b** tumour and **c** liver. Data are presented as mean values  $\pm$  SD ( $n = 5$  biological independent replicates). Statistical significance was calculated by one-way ANOVA. Source data are provided as a Source Data file.

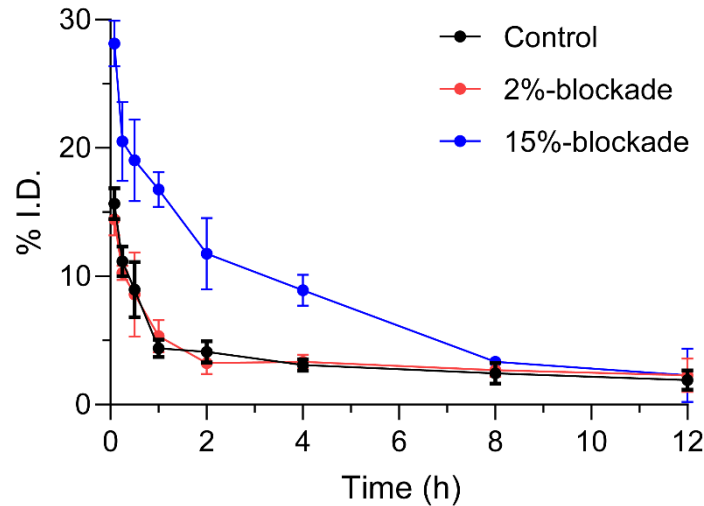

**Supplementary Figure 17. Pharmacokinetics of ICG-loaded 2%NGs with or without RES-blockade.** Data are presented as mean values  $\pm$  SD ( $n = 3$  biological independent replicates). Source data are provided as a Source Data file.

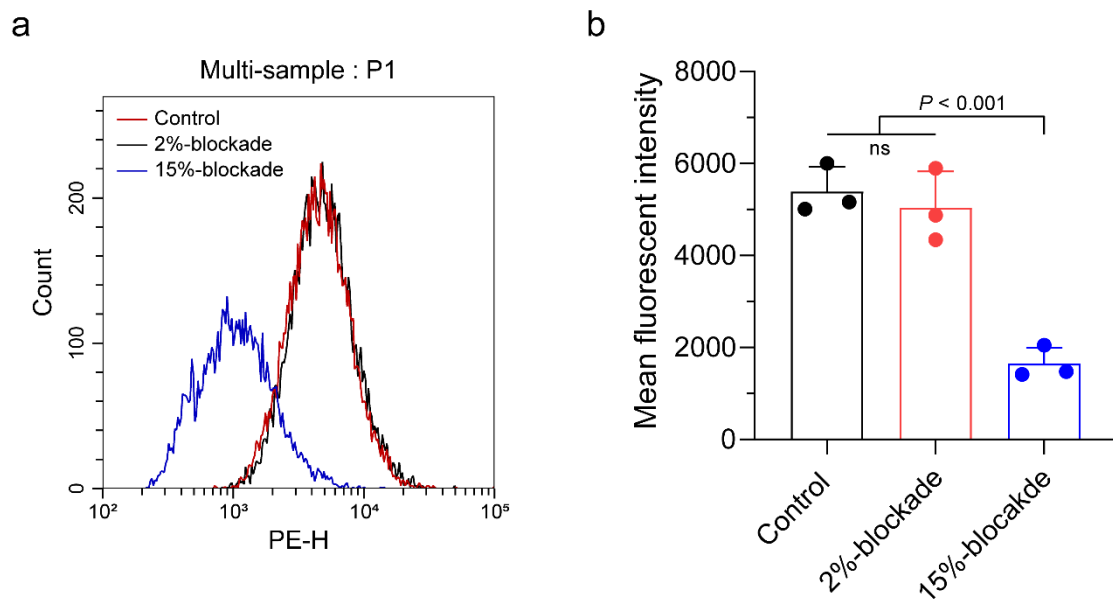

**Supplementary Figure 18. Cellular uptake of Rhodamine-labeled 2%NGs after blockade by nanogels with different stiffness.** **a** Flow cytometry graphs of RAW 264.7 cells internalizing Rhodamine-labeled 2%NGs with or without RES-blockade. **b** Mean fluorescent intensity of RAW 264.7 cells internalizing Rhodamine-labeled 2%NGs with or without RES-blockade. Data are presented as mean values  $\pm$  SD ( $n = 3$  biological independent replicates). Statistical significance was calculated by one-way ANOVA. Source data are provided as a Source Data file.

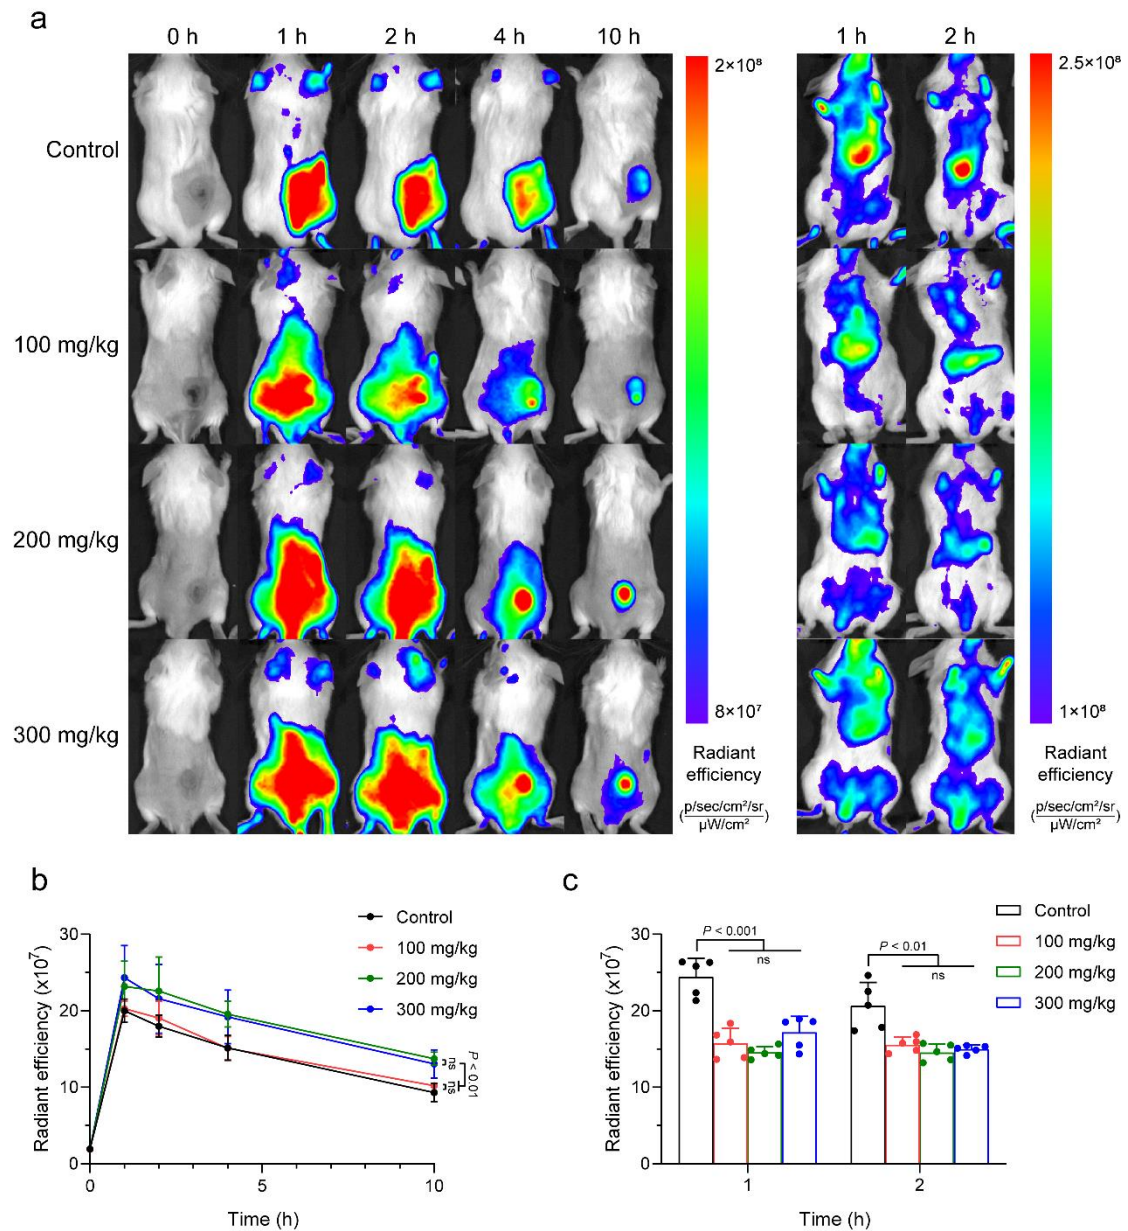

**Supplementary Figure 19. Biodistribution of ICG-loaded 2%NGs after RES-blockade by 15%NGs with different dosage.** **a** In vivo fluorescent images of tumour accumulation and liver accumulation of ICG-loaded 2%NGs after RES-blockade by 15%NGs with different dosage. Semi-quantification of the quantity of ICG-loaded 2%NGs in **b** tumour and **c** liver. Data are presented as mean values  $\pm$  SD ( $n = 5$  biological independent replicates). Statistical significance was calculated by one-way ANOVA. Source data are provided as a Source Data file.



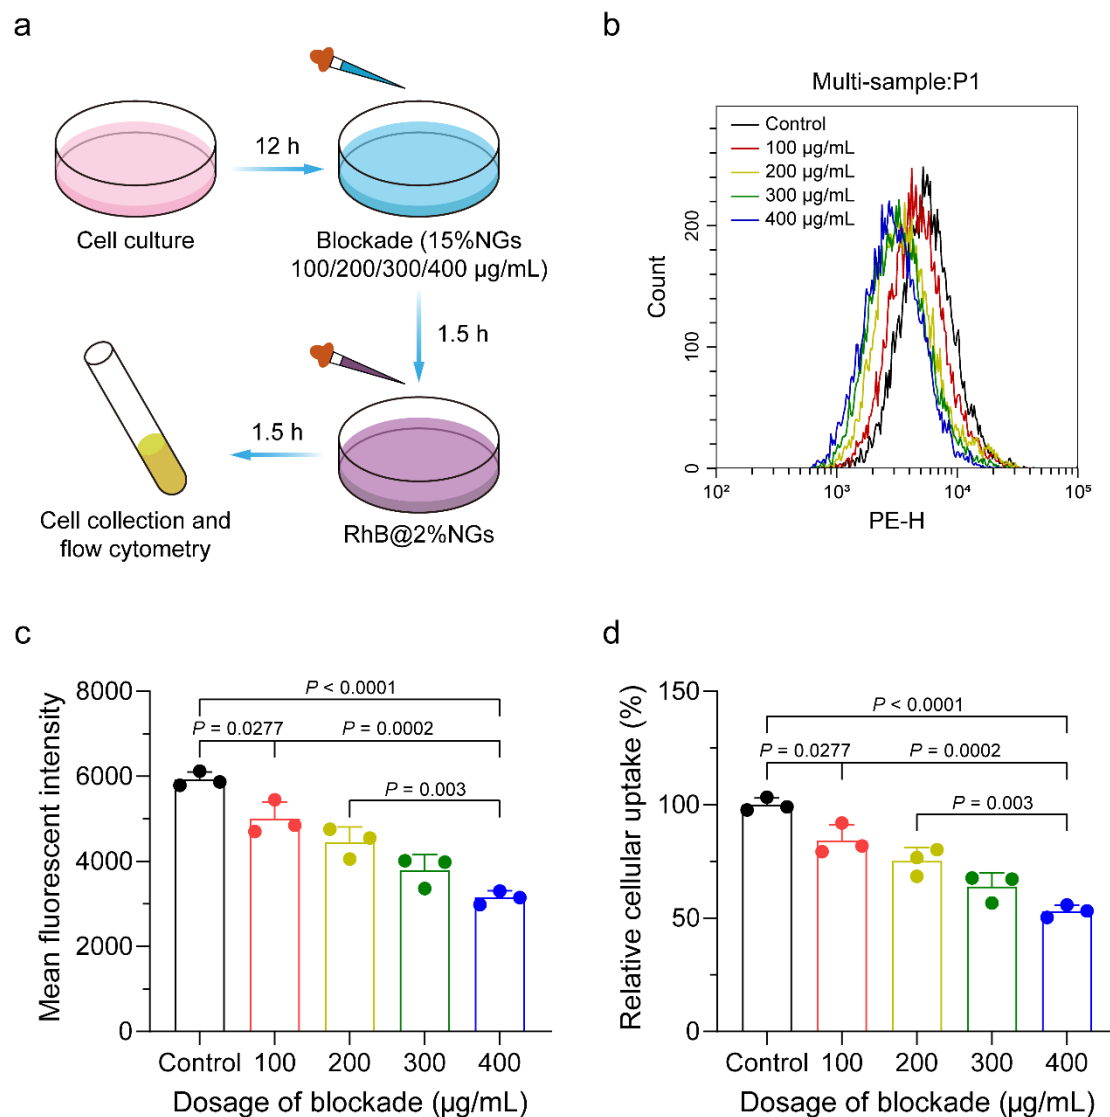

**Supplementary Figure 20. Cellular uptake of Rhodamine-labeled 2%NGs after blockade by 15%NGs with different dosage.** **a** Illustration of in vitro dosage-dependent RES-blockade experiment within RAW 264.7 cells. **b** Flow cytometry graphs of RAW 264.7 cells internalizing Rhodamine-labeled 2%NGs after RES-blockade by 15%NGs with different dosage. **c** Mean fluorescent intensity of RAW 264.7 cells internalizing Rhodamine-labeled 2%NGs after RES-blockade by 15%NGs with different dosage. Data are presented as mean values  $\pm$  SD ( $n = 3$  biological independent replicates). **d** Different blockade efficiency of 15%NGs with different dosage in RAW 264.7 cells. Data are presented as mean values  $\pm$  SD ( $n = 3$  biological independent replicates). Statistical significance was calculated by one-way ANOVA. Source data are provided as a Source Data file.

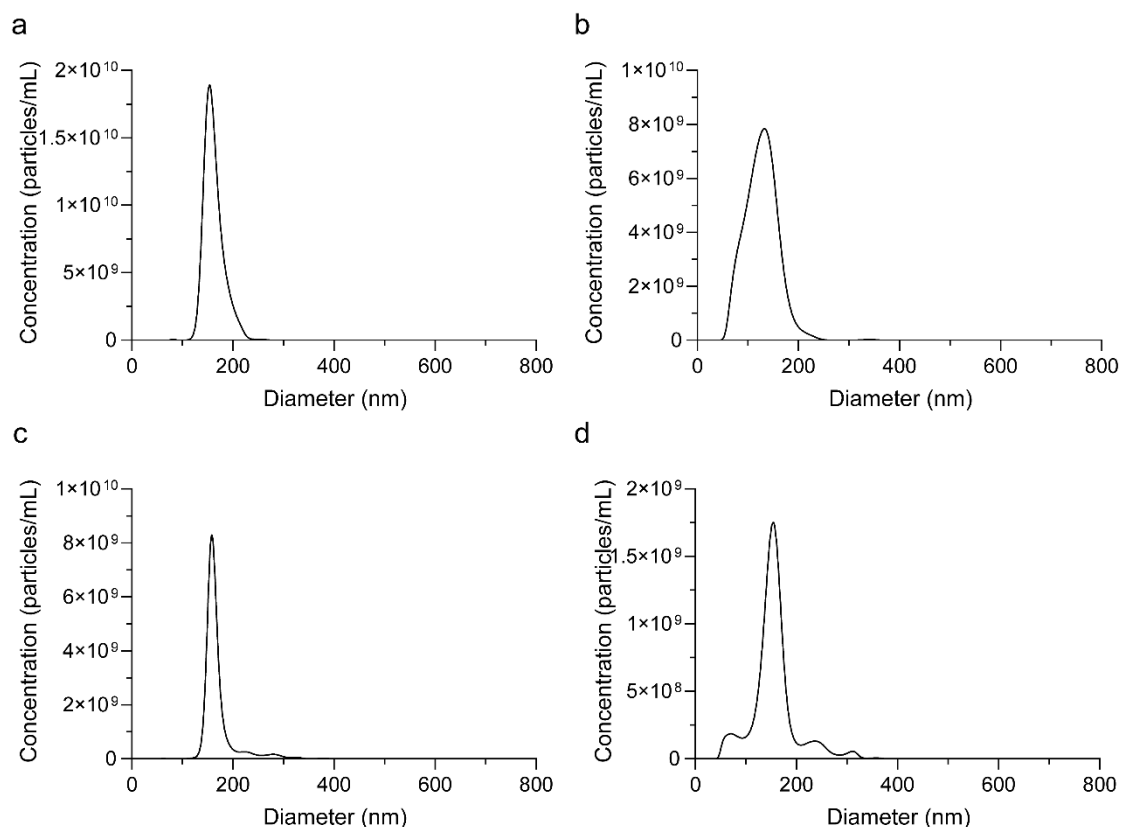

**Supplementary Figure 21. NTA analysis of nanogels with different stiffness.**

Concentration-dependent diameter distribution of nanogels with different stiffness at concentration of 2 mg/mL. **a** 2%NGs, **b** 5%NGs, **c** 10%NGs, **d** 15%NGs. Source data are provided as a Source Data file.

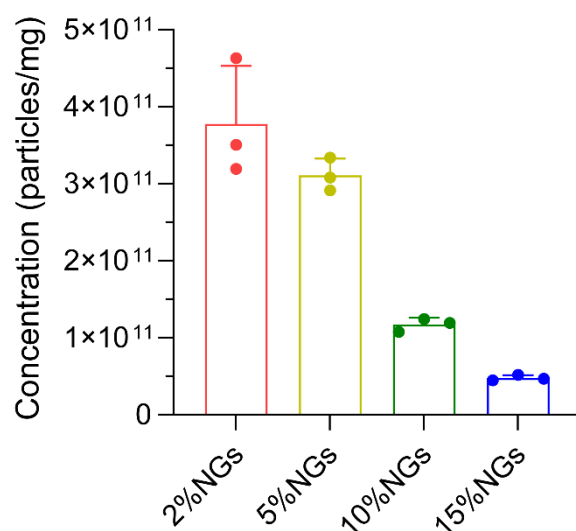

**Supplementary Figure 22. Number of nanogels with different stiffness per milligram**

**by NTA.** Data are presented as mean values  $\pm$  SD ( $n = 3$  independent replicates). Source data are provided as a Source Data file.

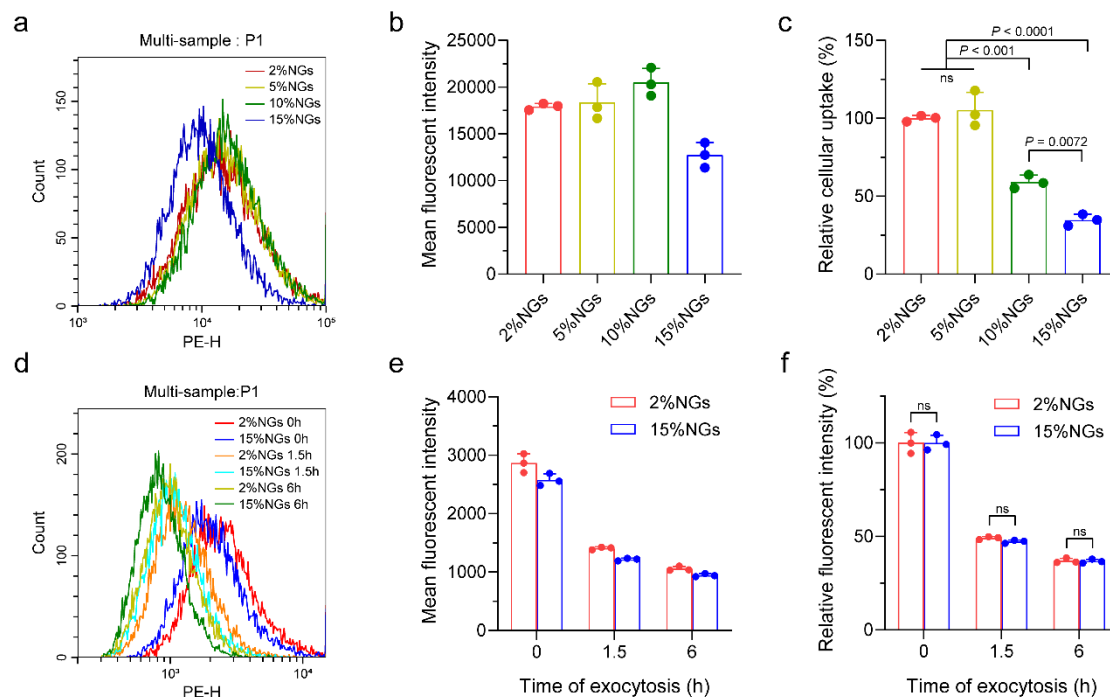

**Supplementary Figure 23. Cellular uptake and exocytosis of Rhodamine-labeled nanogels with different stiffness by RAW 264.7 cells.** **a** Flow cytometry graphs of RAW 264.7 cells internalizing Rhodamine-labeled nanogels with different stiffness. **b** Mean fluorescent intensity of RAW 264.7 cells after internalization of Rhodamine-labeled nanogels with different stiffness. Data are presented as mean values  $\pm$  SD ( $n = 3$  biological independent replicates). **c** Relative cellular uptake efficiency of Rhodamine-labeled nanogels with different stiffness in RAW 264.7 cells. Data are presented as mean values  $\pm$  SD ( $n = 3$  biological independent replicates). Statistical significance was calculated by one-way ANOVA. **d** Flow cytometry graphs of RAW 264.7 cells excreting Rhodamine-labeled nanogels with different stiffness. **e** Mean fluorescent intensity of RAW 264.7 cells after excreting Rhodamine-labeled nanogels with different stiffness. Data are presented as mean values  $\pm$  SD ( $n = 3$  biological independent replicates). **f** Relative fluorescent intensity of RAW 264.7 cells after excreting Rhodamine-labeled nanogels with different stiffness. Data are presented as mean values  $\pm$  SD ( $n = 3$  biological independent replicates). Statistical significance was calculated by unpaired two-sided Student's t-test. Source data are provided as a Source Data file.

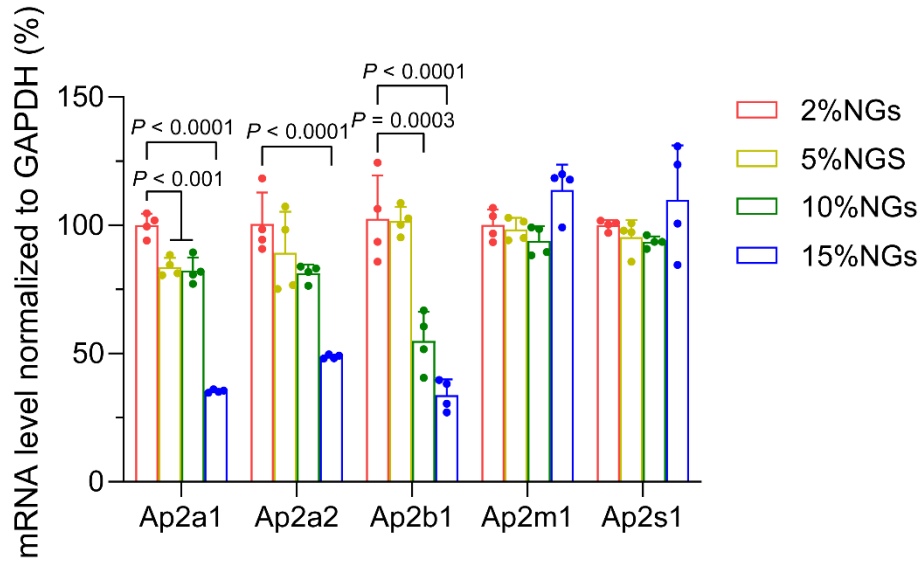

**Supplementary Figure 24. AP-2 mRNA as normalized to GAPDH after incubation with nanogels with different stiffness.** Data are presented as mean values  $\pm$  SD ( $n = 4$  biological independent replicates). Statistical significance was calculated by one-way ANOVA. Source data are provided as a Source Data file.

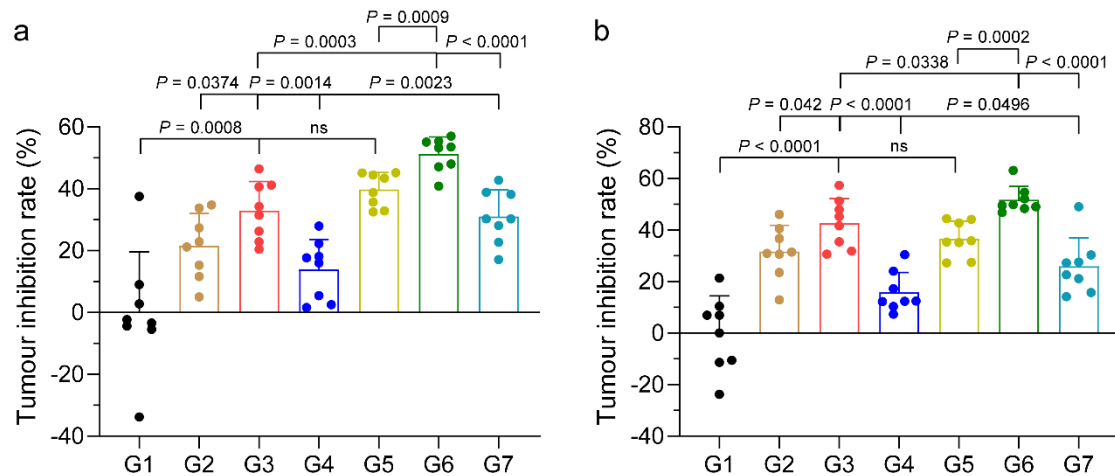

**Supplementary Figure 25. Tumour inhibition rate of different combination of RES-blockade and drug delivery strategy.** **a** Volume-based and **b** weight-based tumour inhibition rate. Data are presented as mean values  $\pm$  SD ( $n = 8$  biological independent replicates). Statistical significance was calculated by unpaired two-sided Student's t-test. G1, Control; G2, Free DOX; G3, DOX@2%NGs; G4, DOX@15%NGs; G5, 2%-blockade + DOX@2%NGs; G6, 15%-blockade + DOX@2%NGs; G7, 15%-blockade + DOX@15%NGs. Source data are provided as a Source Data file.

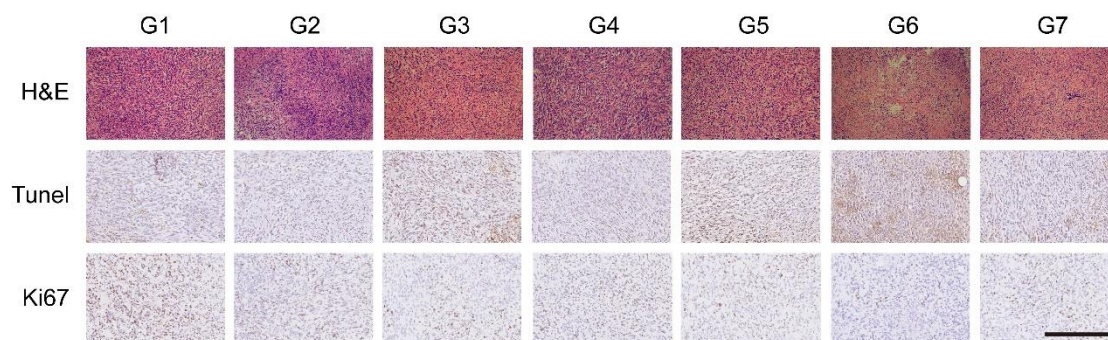

**Supplementary Figure 26. Apoptosis and proliferation of tumour cells after treatment by different combination of RES-blockade and drug delivery strategy.** H&E, Tunel and Ki67 staining of tumours post various treatments. Scale bar = 500  $\mu$ m. G1, Control; G2, Free DOX; G3, DOX@2%NGs; G4, DOX@15%NGs; G5, 2%-blockade + DOX@2%NGs; G6, 15%-blockade + DOX@2%NGs; G7, 15%-blockade + DOX@15%NGs.

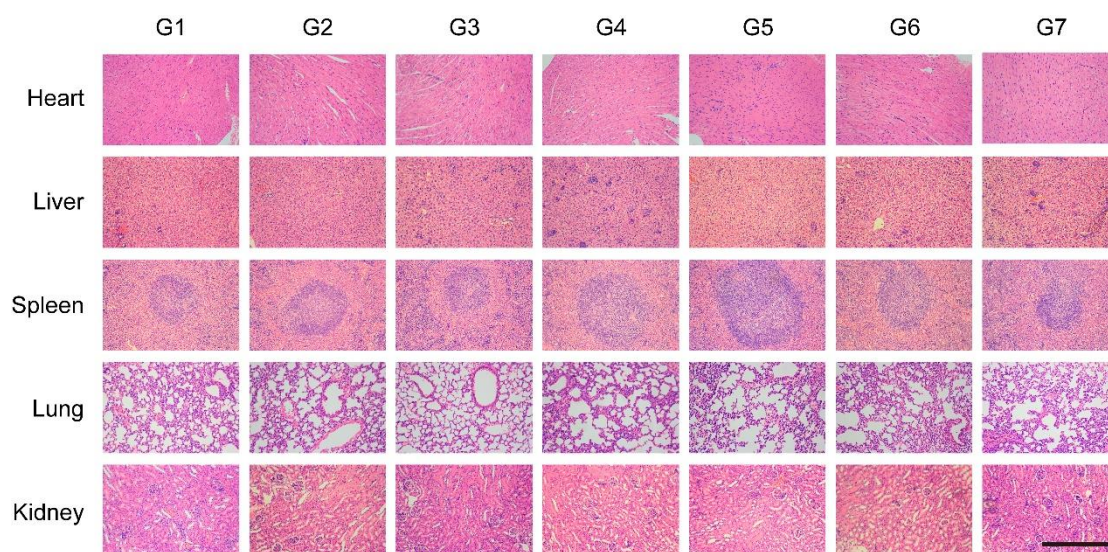

**Supplementary Figure 27. Safety of treatment by different combination of RES-blockade and drug delivery strategy.** H&E staining of major organs, including heart, liver, spleen, lung and kidney. Scale bar = 500  $\mu$ m. G1, Control; G2, Free DOX; G3, DOX@2%NGs; G4, DOX@15%NGs; G5, 2%-blockade + DOX@2%NGs; G6, 15%-blockade + DOX@2%NGs; G7, 15%-blockade + DOX@15%NGs.

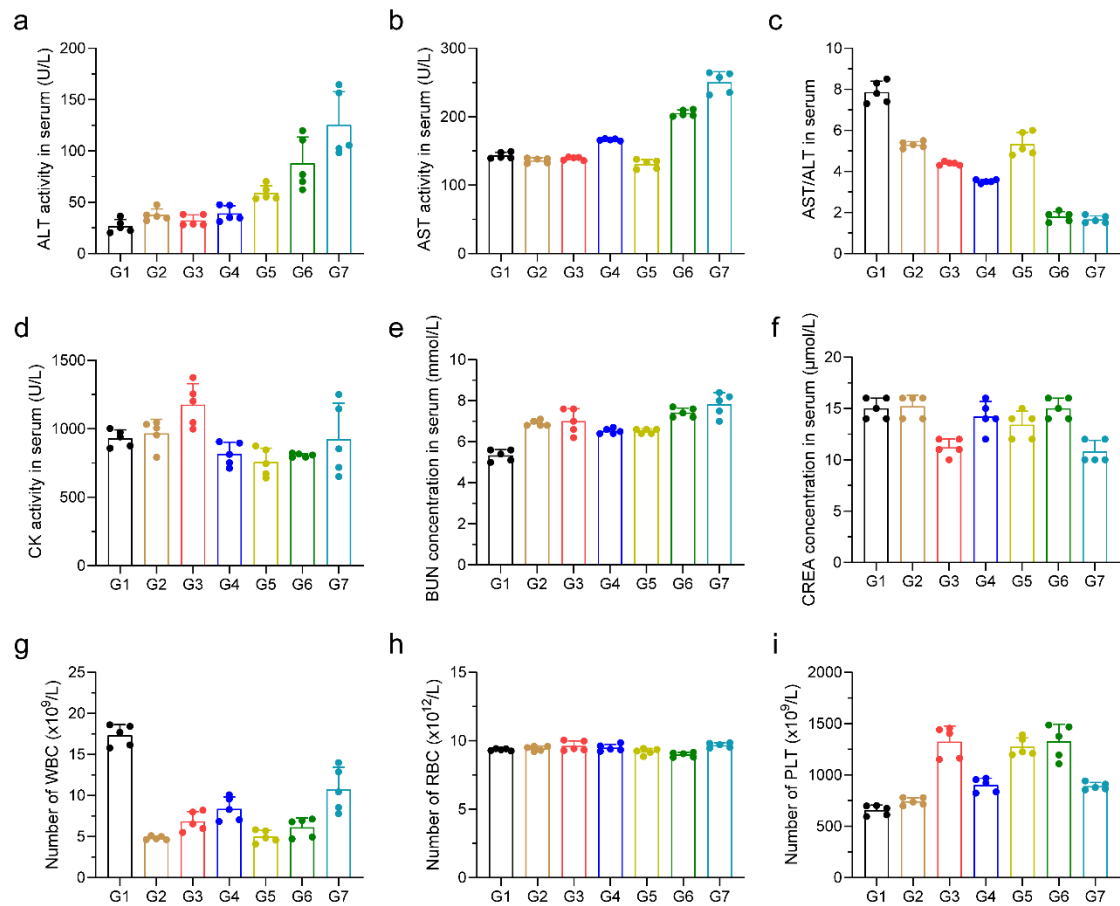

**Supplementary Figure 28. Safety of treatment by different combination of RES-blockade and drug delivery strategy.** a-f Blood biochemical analysis and g-i blood routine examine after treatment. Data are presented as mean values  $\pm$  SD ( $n = 5$  biological independent replicates). G1, Control; G2, Free DOX; G3, DOX@2%NGs; G4, DOX@15%NGs; G5, 2%-blockade + DOX@2%NGs; G6, 15%-blockade + DOX@2%NGs; G7, 15%-blockade + DOX@15%NGs. Source data are provided as a Source Data file.

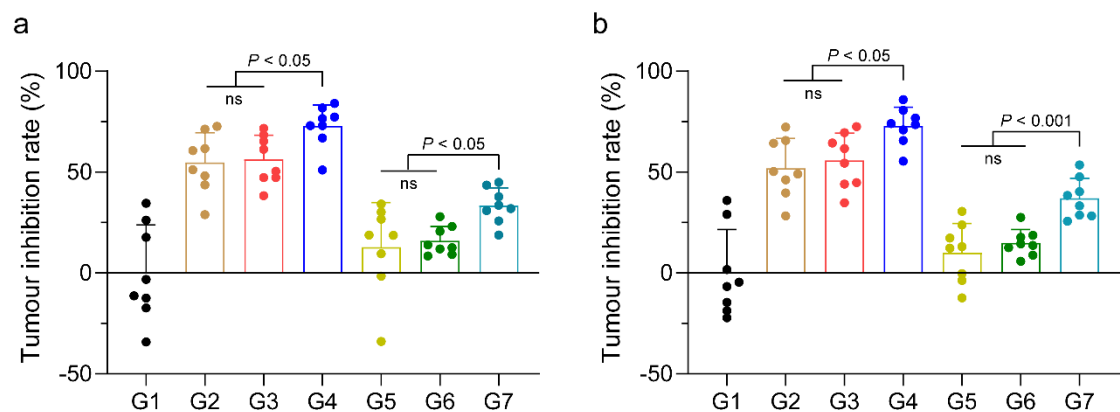

**Supplementary Figure 29. Tumour inhibition rate of commercialized nanomedicine**



**with RES-blockade by soft or stiff nanogels. a** Volume-based and **b** weight-based tumour inhibition rate. Data are presented as mean values  $\pm$  SD ( $n = 8$  biological independent replicates). Statistical significance was calculated by unpaired two-sided Student's t-test. G1, Control; G2, Doxil; G3, 2%-blockade + Doxil; G4, 15%-blockade + Doxil; G5, Abraxane; G6, 2%-blockade + Abraxane; G7, 15%-blockade + Abraxane. Source data are provided as a Source Data file.

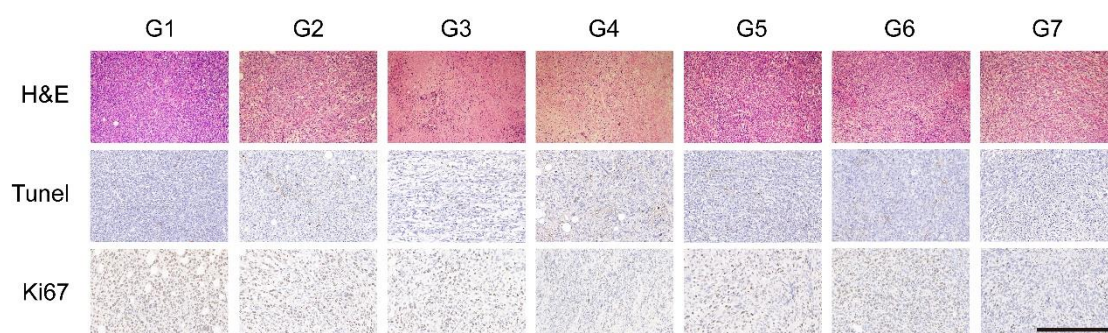

**Supplementary Figure 30. Apoptosis and proliferation of tumour cells after treatment by commercialized nanomedicine with RES-blockade by soft or stiff nanogels.** H&E, Tunel and Ki67 staining of tumours. Scale bar = 500  $\mu$ m. G1, Control; G2, Doxil; G3, 2%-blockade + Doxil; G4, 15%-blockade + Doxil; G5, Abraxane; G6, 2%-blockade + Abraxane; G7, 15%-blockade + Abraxane.

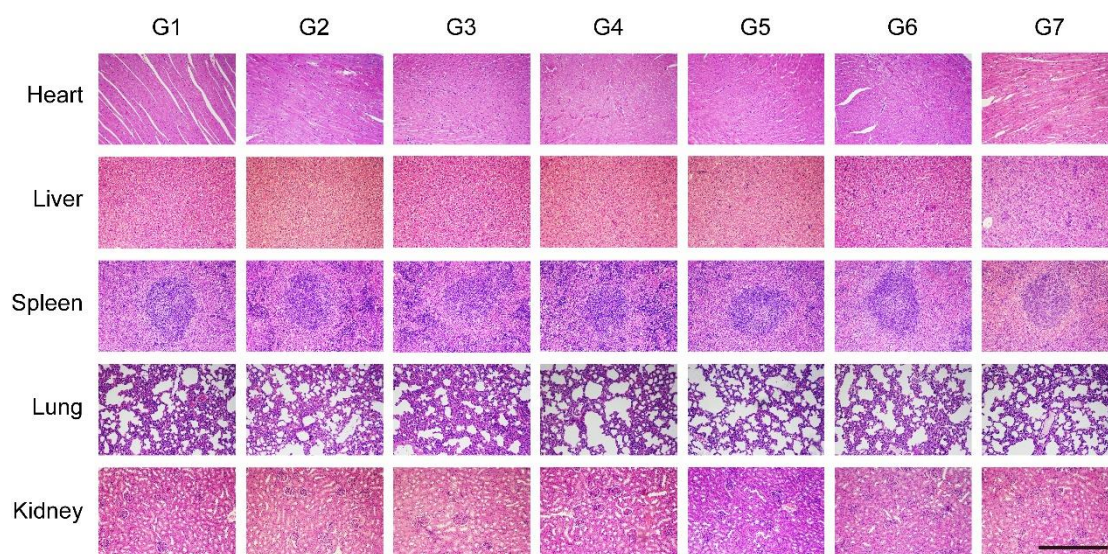

**Supplementary Figure 31. Safety of treatment by commercialized nanomedicine with RES-blockade by soft or stiff nanogels.** H&E staining of major organs, including heart,



liver, spleen, lung and kidney. Scale bar = 500  $\mu$ m. G1, Control; G2, Doxil; G3, 2%-blockade + Doxil; G4, 15%-blockade + Doxil; G5, Abraxane; G6, 2%-blockade + Abraxane; G7, 15%-blockade + Abraxane.

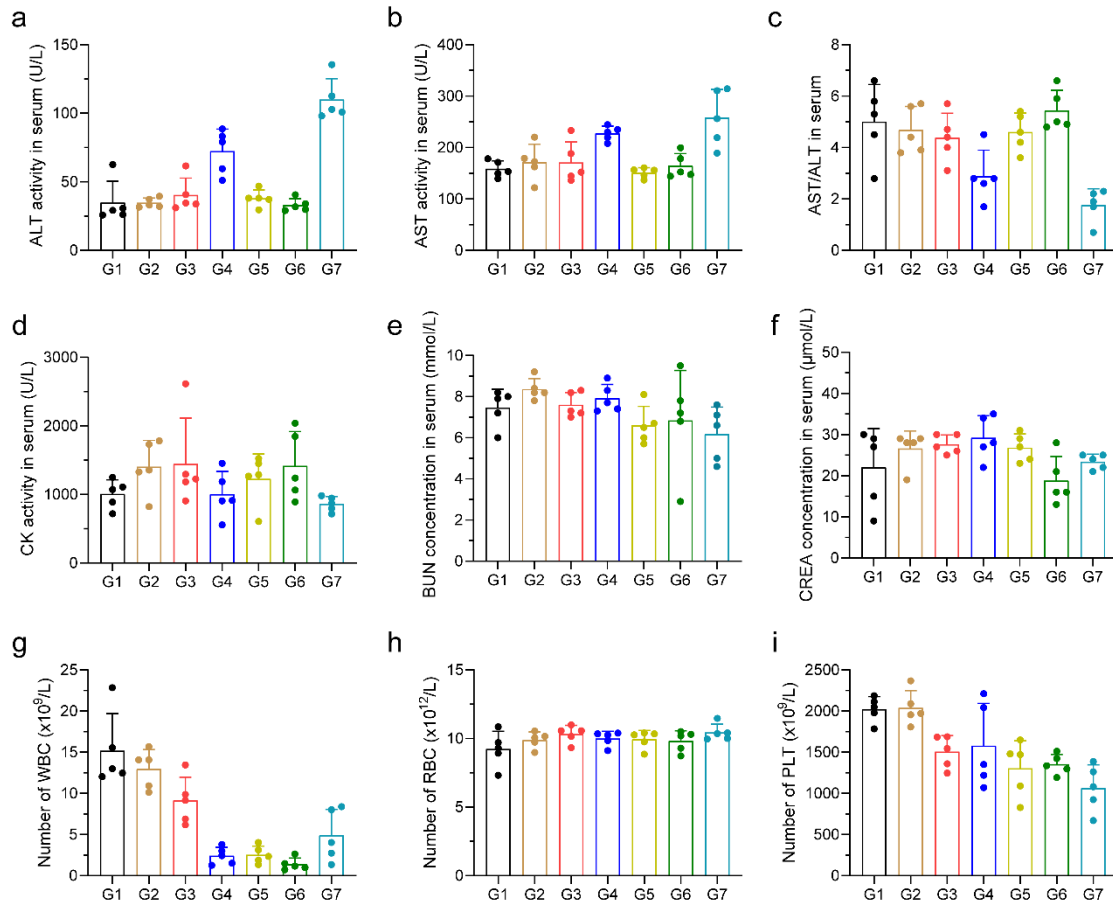

**Supplementary Figure 32. Safety of treatment by commercialized nanomedicine with RES-blockade by soft or stiff nanogels. a-f** Blood biochemical analysis and **g-i** blood routine examine after treatment. Data are presented as mean values  $\pm$  SD ( $n = 5$  biological independent replicates). G1, Control; G2, Doxil; G3, 2%-blockade + Doxil; G4, 15%-blockade + Doxil; G5, Abraxane; G6, 2%-blockade + Abraxane; G7, 15%-blockade + Abraxane. Source data are provided as a Source Data file.
